# Supplementary material
Source: Research Square preprint supplement (doi:10.21203/rs.3.rs-9687433/v1)
Supplement: Supplementary file 1 [file b44a11d8dd0c5683448b11ba.docx]

# **Supplementary tables**

#### Supplementary Table S1. Heterogeneity by hukou (full controls)

| **Subsample** | **Gap_town:**  **Expropriation unfairness (β)** | **95% CI** | **N** |
| --- | --- | --- | --- |
| Agricultural hukou (hukou=1) | 0.234*** | [0.144, 0.324] | 12716 |
| Non-agricultural/other (hukou=0) | 0.148* | [0.030, 0.266] | 9863 |

**Note:** Entries are coefficients from Complex Samples generalized linear models estimated separately by hukou subgroup. The dependent variable is the central–township trust gap. All models include year and province fixed effects and individual controls for gender, age, education, logged household income, and CPC membership. Hukou is not included as a control because models are estimated within hukou subgroups. Estimates account for CSS weights, PSU, and year-specific primary sampling units through the Complex Samples design. 95% confidence intervals are reported in brackets. *p<0.05, **p<0.01, ***p<0.001.

#### Supplementary Table S2. Robustness check

##### Panel A. Clustering at SSU level (full controls)

| **Dependent variable** | **Expropriation unfairness (β)** | **95% CI** | **N** |
| --- | --- | --- | --- |
| Gap_county | 0.166*** | [0.106, 0.226] | 22812 |
| Gap_town | 0.216*** | [0.147, 0.286] | 22579 |

##### Panel B. Models without province fixed effects (full controls)

| **Dependent variable** | **Expropriation unfairness (β)** | **95% CI** | **N** |
| --- | --- | --- | --- |
| Gap_county | 0.162*** | [0.101, 0.223] | 22812 |
| Gap_town | 0.217*** | [0.146, 0.288] | 22579 |

**Note**: Entries are coefficients from Complex Samples generalized linear models. Panel A uses year-specific SSU clusters; Panel B uses the main PSU design but excludes province fixed effects. All models include the full set of individual controls; Panel A also includes year and province fixed effects, while Panel B includes year fixed effects only. 95% confidence intervals are reported in brackets. *p<0.05, **p<0.01, ***p<0.001.

#### Supplementary Table S3.

##### Panel A. Alternative issue-salience benchmarks and central–local trust gap

|  |  | **Housing** | **Corruption** | **Pollution** |
| --- | --- | --- | --- | --- |
| Gap_county | β | -0.038** | 0.246*** | -0.022 |
| 95% CI | [-0.069, -0.008] | [0.216, 0.275] | [-0.055, 0.011] |
| N | 18563 | 22812 | 22812 |
| Gap_town | β | -0.054** | 0.325*** | -0.027 |
| 95% CI | [-0.092, -0.015] | [0.292, 0.359] | [-0.063, 0.009] |
| N | 18367 | 22579 | 22579 |
| Year FE |  | Yes | Yes | Yes |
| Province FE |  | Yes | Yes | Yes |
| Controls (gender, age, edu, hukou, ln_fincom, cpc) |  | Yes | Yes | Yes |
| Weight |  | CSS weight | CSS weight | CSS weight |
| Cluster |  | PSU | PSU | PSU |

##### Panel B. Expropriation unfairness and corruption salience jointly included (full controls)

|  | **Gap_county** | **Gap_town** |
| --- | --- | --- |
| Expropriation unfairness salience | 0.146*** | 0.188*** |
| 95% CI | [0.082, 0.209] | [0.115, 0.262] |
| Corruption salience | 0.242*** | 0.320*** |
| 95% CI | [0.212, 0.272] | [0.287, 0.354] |
| Year FE | Yes | Yes |
| Province FE | Yes | Yes |
| Controls (gender, age, edu, hukou, ln_fincom, cpc) | Yes | Yes |
| N | 22812 | 22579 |
| Weight | CSS weight | CSS weight |
| Cluster | PSU | PSU |

**Note:** Entries are coefficients from Complex Samples generalized linear models using pooled CSS 2019/2021/2023 data. Panel A replaces expropriation-compensation unfairness salience with alternative issue-salience indicators from the same “major social problems” module. Panel B jointly includes expropriation-compensation unfairness salience and corruption salience. All models include year and province fixed effects and individual controls for gender, hukou status, age, education, logged household income, and CPC membership. Observations are unweighted counts of respondents included in each model. Estimates account for CSS survey weights, and year-specific primary sampling units through the Complex Samples design. 95% confidence intervals are reported in brackets. *p<0.05, **p<0.01, ***p<0.001.

#### Supplementary Table S4. Robustness: controlling for overall local government performance evaluation, 2019,2021 asked sample

|  | **Gap_county** | **Gap_town** |
| --- | --- | --- |
| Expropriation unfairness salience | 0.080* | 0.100** |
| 95% CI | [0.015, 0.145] | [0.029, 0.171] |
| Overall local government performance evaluation | -0.367*** | -0.457*** |
| 95% CI | [-0.392, -0.342] | [-0.481, -0.433] |
| Year FE | Yes | Yes |
| Province FE | Yes | Yes |
| Controls (gender, age, edu, hukou, ln_fincom, cpc) | Yes | Yes |
| N | 16660 | 16488 |
| Weight | CSS weight | CSS weight |
| Cluster | PSU | PSU |

Note: Because the local performance item and the “most serious social problems” item are administered in different split-ballot forms in 2023, they cannot be jointly observed for the same respondents; therefore, this robustness check is estimated using the 2019 and 2021 sample and is restricted to respondents who provided a valid local performance evaluation.

#### Supplementary Table S5. Year-specific estimates of expropriation unfairness salience and central–local trust gap (full controls)

|  | **2019** | **2021** | **2023** |
| --- | --- | --- | --- |
| **Gap_county** | 0.100* | 0.204*** | 0.243*** |
| 95% CI | [0.001, 0.198] | [0.110, 0.297] | [0.130, 0.356] |
| N | 8906 | 8208 | 5698 |
| **Gap_town** | 0.158** | 0.216*** | 0.345*** |
| 95% CI | [0.043, 0.273] | [0.109, 0.323] | [0.204, 0.486] |
| N | 8792 | 8143 | 5644 |
| Weight | CSS weight | CSS weight | CSS weight |
| Cluster | PSU | PSU | PSU |

Note: *p<0.05, **p<0.01, ***p<0.001.

#### Supplementary Table S6. Supplementary results: binary outcomes for central–local trust gap (Complex Samples Logistic, full controls)

|  | Pr (central > county) | | Pr (central > town) | |
| --- | --- | --- | --- | --- |
| Expropriation unfairness salience – Odds ratio | 1.486*** | 1.425*** | 1.437*** | 1.414*** |
| 95% CI | [1.321, 1.672] | [1.254, 1.619] | [1.262, 1.634] | [1.236, 1.616] |
| Year FE | Yes | Yes | Yes | Yes |
| Province FE | Yes | Yes | Yes | Yes |
| Controls (gender, age, edu, hukou, ln_fincom, cpc) | No | Yes | No | Yes |
| N | 24740 | 22812 | 24497 | 22579 |
| Weight | CSS weight | CSS weight | CSS weight | CSS weight |
| Cluster | PSU | PSU | PSU | PSU |

**Note:** Complex Samples Logistic regressions using pooled CSS 2019/2021/2023 data. Dependent variables equal 1 if respondents report higher trust in the central government than in the county (or township) government and 0 otherwise (including ties); cases with missing trust at either level are treated as missing. Reported figures are odds ratios (OR = Exp(B)) with 95% confidence intervals in brackets.

#### Supplementary Table S7. Fairness-perception diagnostics

|  | **Fairness**  **(1–10)** | **Gap_county** | **Gap_town** |
| --- | --- | --- | --- |
| Expropriation unfairness salience | -0.275** | 0.144*** | 0.189*** |
| 95% CI | [-0.439, -0.111] | [0.085, 0.203] | [0.120, 0.258] |
| Overall fairness perception |  | -0.081*** | -0.099*** |
| 95% CI |  | [-0.087, -0.075] | [-0.105, -0.092] |
| Year FE | Yes | Yes | Yes |
| Province FE | Yes | Yes | Yes |
| Controls (gender, age, edu, hukou, ln_fincom, cpc) | Yes | Yes | Yes |
| N | 23926 | 22729 | 22495 |
| Weight | CSS weight | CSS weight | CSS weight |
| Cluster | PSU | PSU | PSU |

**Note:** *p<0.05, **p<0.01 ***p<0.001

#### Supplementary Table S8. Robustness: controlling for generalised social trust (full controls)

|  | **Gap_county** | **Gap_town** |
| --- | --- | --- |
| Expropriation unfairness salience | 0.154*** | 0.203*** |
| 95% CI | [0.092, 0.215] | [0.131, 0.275] |
| generalised social trust (1–10) | -0.068*** | -0.085*** |
| 95% CI | [-0.074, -0.063] | [-0.091, -0.078] |
| Year FE | Yes | Yes |
| Province FE | Yes | Yes |
| Controls (gender, age, edu, hukou, ln_fincom, cpc) | Yes | Yes |
| N | 22739 | 22507 |
| Weight | CSS weight | CSS weight |
| Cluster | PSU | PSU |

**Note:** *p<0.05, **p<0.01 ***p<0.001

#### Supplementary Table S9. Reverse association diagnostic: trust gap predicting expropriation-compensation unfairness salience (complex-sample logistic regression)

|  | **Dependent variable: Lists “unfair land-expropriation compensation” as a major social problem (1=yes)** |
| --- | --- |
| Central–township trust gap (central minus township) | 1.283*** |
| 95% CI | [1.181, 1.394] |
| Year FE | Yes |
| Province FE | Yes |
| Controls (gender, age, edu, hukou, ln_fincom, cpc) | Yes |
| N | 22579 |
| Weight | CSS weight |
| Cluster | PSU |

**Notes: Entries are odds ratios from a Complex Samples logistic regression. The dependent variable equals 1 if the respondent lists unfair land-expropriation compensation as a major social problem and 0 otherwise, conditional on being asked the major-social-problems module. Because the SPSS output used “yes” as the reference category, the reported odds ratio for the trust gap is inverted so that values above 1 indicate a higher likelihood of listing unfair compensation as a major social problem.** *p<0.05, **p<0.01 ***p<0.001

#### Supplementary Table S10. Land-right heterogeneity: land-right entitlements and the central–township trust gap (2021–2023).

|  | **Homestead entitlement** | **Contract-right certificate** | **Collective-share entitlement** |
| --- | --- | --- | --- |
| Expropriation unfairness salience | 0.328**  [0.124, 0.531] | 0.294***  [0.131, 0.456] | 0.273***  [0.147, 0.399] |
| Land-right indicator | 0.022  [-0.024, 0.068] | 0.008  [−0.036, 0.051] | -0.098***  [−0.160, −0.037] |
| Interaction: salience × land-right indicator | -0.076  [−0.314,0.163] | -0.012  [−0.228,0.204] | 0.003  [−0.243,0.249] |
| Year FE | Yes | Yes | Yes |
| Province FE | Yes | Yes | Yes |
| Controls | Yes | Yes | Yes |
| N | 8093 | 7898 | 7867 |
| Weight | CSS weight | CSS weight | CSS weight |
| Cluster | PSU | PSU | PSU |

Notes: Dependent variable: Central–township trust gap (central-government trust minus township-government trust). The sample is restricted to the 2021 and 2023 waves in which land-right questions were administered and to respondents who were asked the social-problem question. Expropriation unfairness salience equals 1 if the respondent lists it as a major social problem and 0 otherwise (conditional on being asked). Each column estimates a separate interaction model between issue salience and a land-right indicator. *p<0.05, **p<0.01 ***p<0.001

#### Supplementary Table S11. Grassroots governance-quality diagnostics (2019, 2021)

|  | **Governance quality index** | **Gap_town**  **(baseline)** | **Gap_town**  **(adding governance quality_** |
| --- | --- | --- | --- |
| Expropriation unfairness salience | -0.229***  [−0.290, −0.168] | 0.054  [−0.019, 0.126] | 0.170***  [0.084, 0.257] |
| Governance quality index |  | -0.509***  [−0.532, −0.486] |  |
| Year FE | Yes | Yes | Yes |
| Province FE | Yes | Yes | Yes |
| Controls (gender, age, edu, hukou, ln_fincom, cpc) | Yes | Yes | Yes |
| N | 15482 | 15482 | 15482 |
| Weight | CSS weight | CSS weight | CSS weight |
| Cluster | PSU | PSU | PSU |

Notes: The sample is restricted to the 2019 and 2021 waves in which both the “major social problems” item and the governance-quality items are jointly observed for the same respondents; in 2023 these items are administered in different split-ballot forms and therefore cannot be jointly observed. “Expropriation unfairness salience” equals 1 if the respondent lists “unfair land-expropriation compensation” as a major social problem and 0 otherwise, conditional on being asked the social-problem question (respondents not asked are treated as missing and excluded). The governance quality index is constructed as the average of four governance-quality items (with “don’t know/unsure” coded as missing) and is calculated only for respondents asked the governance-quality module; at least three valid item responses are required. 95% confidence intervals are reported in brackets. *p<0.05, **p<0.01, ***p<0.001.

#### Supplementary Table S12. Community-type heterogeneity (interviewer-recorded): issue salience and the central–township trust gap (2021–2023) DV：gap_town

|  | **Gap_town** |
| --- | --- |
| Unfair expropriation-compensation salience | 0.193*** [0.049, 0.337] |
| High land-governance exposure (converted/rural community) | -0.039 [−0.081, 0.003] |
| Interaction: salience × high-exposure community | 0.100 [−0.077, 0.277] |
| Year FE / Province FE / Controls | Yes |
| N | 13695 |
| Weight | CSS weight |
| Cluster | PSU |

Note: The sample is restricted to respondents who were asked the “major social problems” question; issue salience is coded as 1 if the respondent lists “unfair land-expropriation compensation” as a major social problem and 0 otherwise (respondents not asked are treated as missing and excluded). Community type is recorded by the interviewer (not self-reported). High land-governance exposure equals 1 for “recently converted from rural to urban community” or “rural community” (types 6–7) and 0 for other urban community types (types 1–5). 95% confidence intervals are reported in brackets. *p<0.05, **p<0.01, ***p<0.001.

#### Supplementary Table S13. Controlling for general issue concern (count of other issues selected)

|  | **Gap_county** | **Gap_town** | **Pr(central > town)** |
| --- | --- | --- | --- |
| Expropriation unfairness salience | 0.263***  [0.196, 0.331] | 0.356***  [0.276, 0.437] | 2.071***  [1.786, 2.404] |
| General issue concern (count of other issues selected) | 0.114***  [0.097, 0.131] | 0.166***  [0.144, 0.187] | 1.563***  [1.468, 1.661] |
| Year FE | Yes | Yes | Yes |
| Province FE | Yes | Yes | Yes |
| Controls (gender, age, edu, hukou, ln_fincom, cpc) | Yes | Yes | Yes |
| N | 22815 | 22583 | 22583 |
| Weight | CSS weight | CSS weight | CSS weight |
| Cluster | PSU | PSU | PSU |

Note: Panel (1)–(2) report coefficients from Complex Samples GLM models; Panel (3) reports odds ratios (OR = Exp(B)) from a Complex Samples Logistic regression. “General issue concern” is measured as the number ofothersocial problems selected within the same “major social problems (up to three)” module (excluding the unfair expropriation-compensation item) and is defined only among respondents who were asked the social-problem module (others are treated as missing and excluded). In Panel (3), the dependent variable equals 1 if trust in the central government is strictly higher than trust in the township government and 0 otherwise (including ties); cases with missing trust at either level are treated as missing. 95% confidence intervals are in brackets. *p<0.05, **p<0.01, ***p<0.001.

#### Supplementary Table S14. Sample flow across waves and modules

| **Sample step** | **2019** | **2021** | **2023** | **Total** |
| --- | --- | --- | --- | --- |
| Full sample (all respondents) | 10283 | 10136 | 13035 | 33454 |
| Asked “major social problems” module | 10035 | 9738 | 6467 | 26240 |
| Non-missing central–township trust gap | 9305 | 9181 | 6011 | 24497 |
| Asked governance-quality module & valid gov_quality * | 8389 | 8435 | – | 16824 |
| Governance-quality mechanism regression sample (jointly observed + non-missing controls)** | 7935 | 7549 | – | 15484 |
| Asked land-rights module (asked_b7d=1) & non-missing gap_town (2021–2023) | – | 4681 | 4158 | 8839 |

Note: The “major social problems” module is administered only to a subset of respondents; issue-salience variables are coded only among respondents asked this module (others are treated as missing and excluded). The governance-quality index is observed jointly with the core salience measure only in 2019 and 2021 due to the 2023 split-ballot design. The land-rights module is available only in 2021 and 2023; the land-rights analytic sample is further restricted to respondents with non-missing gap_town.
* “Valid gov_quality” requires at least three non-missing governance-quality items (with “don’t know/unsure” coded as missing).
** The mechanism regression estimation sample may be slightly smaller than the “eligible” sample reported here because it additionally excludes cases with missing covariates and, in Complex Samples procedures, a small number of cases may be dropped due to survey-design requirements in the plan file (e.g., design-variable validity).

#### Supplementary Table S15. Balance diagnostics: asked vs. not asked the “major social problems” module

| **Variable** | **Not asked**  **(asked=0)** | **Asked (asked=1)** | **Diff**  **(1−0)** | **SMD** |
| --- | --- | --- | --- | --- |
| Age (years) | 47.83 (14.18) [N=7214] | 46.39 (14.33) [N=26240] | −1.44 | −0.101 |
| Education (card item) | 3.84 (2.22) [N=7213] | 3.84 (2.17) [N=26214] | 0.00 | 0.000 |
| ln(fincome) | 10.90 (1.32) [N=6725] | 10.80 (1.46) [N=24292] | −0.10 | −0.070 |
| gender (=1), % | 44.21 [N=7214] | 43.82 [N=26240] | −0.39 pp | −0.008 |
| Agricultural hukou (=1), % | 65.78 [N=7188] | 65.96 [N=26028] | +0.18 pp | +0.004 |
| CPC member (=1), % | 9.51 [N=7214] | 10.14 [N=26239] | +0.63 pp | +0.021 |

Note: Entries are unweighted. For continuous variables, cells report mean (SD); for binary indicators, cells report percentages. SMD denotes the standardized mean difference; values below 0.10 are typically considered indicative of good balance on observables.
